# Supplementary material
Source: MDPI journal article supplement (https://www.mdpi.com/2673-9623/2/4/13)
Supplement: s1 [file s1]

## Supplementary Materials

Table S1: Fatty acid distribution in the neutral lipid (NL), free fatty acid (FFA) and polar lipid (PL) fractions of blade and stipe from *Laminaria hyperborea*.

|                                      | Blade      |            |            | Stipe      |            |            |
|--------------------------------------|------------|------------|------------|------------|------------|------------|
|                                      | NL         | FFA        | PL         | NL         | FFA        | PL         |
| C8:0                                 | -          | < LOQ      | -          | -          | -          | -          |
| C9:0                                 | < 0.1      | < 0.1      | -          | -          | < 0.1      | -          |
| C10:0                                | < 0.1      | < LOQ      | -          | < 0.1      | 0.1 ± 0.0  | -          |
| C11:0                                | -          | < 0.1      | -          | < 0.1      | -          | -          |
| C12:0                                | < 0.1      | < 0.1      | -          | < 0.1      | 0.1 ± 0.0  | < 0.1      |
| C13:0                                | < 0.1      | < 0.1      | -          | -          | < 0.1      | -          |
| C14:0                                | 5.6 ± 0.2  | 8.5 ± 0.1  | 8.0 ± 0.1  | 8.1 ± 0.2  | 9.2 ± 0.2  | 17.4 ± 0.3 |
| C15:0                                | 0.1 ± 0.0  | 0.2 ± 0.0  | 0.1 ± 0.0  | 0.1 ± 0.0  | 0.5 ± 0.0  | 0.2 ± 0.0  |
| C16:0                                | 7.0 ± 0.1  | 23.0 ± 0.2 | 10.2 ± 0.1 | 8.0 ± 0.2  | 32.8 ± 0.4 | 15.5 ± 0.1 |
| C17:0                                | 3.2 ± 0.1  | < 0.1      | < 0.1      | 0.1 ± 0.0  | 0.3 ± 0.0  | 0.1 ± 0.0  |
| C18:0                                | 0.2 ± 0.0  | 0.6 ± 0.0  | 0.2 ± 0.0  | 0.3 ± 0.0  | 5.9 ± 0.3  | 0.2 ± 0.0  |
| C20:0                                | 0.1 ± 0.0  | 0.2 ± 0.0  | 0.2 ± 0.0  | 0.2 ± 0.0  | 0.2 ± 0.0  | 0.3 ± 0.0  |
| C22:0                                | -          | < 0.1      | -          | -          | < 0.1      | -          |
| C24:0                                | -          | < 0.1      | < 0.1      | -          | 0.1 ± 0.0  | -          |
| C26:0                                | -          | < 0.1      | -          | -          | -          | -          |
| ΣSFA                                 | 16.2 ± 0.2 | 32.5 ± 0.2 | 18.7 ± 0.1 | 16.8 ± 0.2 | 49.2 ± 0.4 | 33.7 ± 0.3 |
| C14:1 <sup>b</sup>                   | -          | < 0.1      | -          | -          | 0.1 ± 0.0  | -          |
| C14:1 <sub>cis</sub> 9               | 0.1 ± 0.0  | < 0.1      | < 0.1      | 0.1 ± 0.0  | -          | < 0.1      |
| C16:1 <sub>cis</sub> 7               | < 0.1      | < 0.1      | < 0.1      | 0.1 ± 0.0  | 0.1 ± 0.0  | < 0.1      |
| C16:1 <sub>cis</sub> 9               | 3.3 ± 0.0  | 4.3 ± 0.0  | 3.3 ± 0.0  | 6.1 ± 0.2  | 10.6 ± 0.1 | 5.8 ± 0.1  |
| C16:1 <sub>cis</sub> 11 <sup>a</sup> | -          | < 0.1      | -          | < 0.1      | 0.2 ± 0.0  | < 0.1      |
| C17:1 <sub>cis</sub> 9               | < 0.1      | < 0.1      | -          | < 0.1      | 0.2 ± 0.0  | < 0.1      |
| C18:1 <sub>cis</sub> 9               | 19.3 ± 0.2 | 18.8 ± 0.1 | 17.7 ± 0.2 | 23.1 ± 0.4 | 15.3 ± 0.1 | 31.4 ± 0.3 |
| C18:1 <sub>cis</sub> 11              | 0.1 ± 0.0  | 0.1 ± 0.0  | 0.1 ± 0.0  | 0.3 ± 0.0  | 2.3 ± 0.1  | 0.4 ± 0.0  |
| C20:1 <sub>cis</sub> 9               | -          | < 0.1      | 0.1 ± 0.0  | 0.1 ± 0.0  | 0.1 ± 0.0  | -          |
| C20:1 <sub>cis</sub> 11              | -          | -          | 0.1 ± 0.0  | -          | -          | -          |
| C24:1 <sup>b</sup>                   | -          | < 0.1      | < 0.1      | -          | 0.1 ± 0.0  | -          |
| C24:1 <sub>cis</sub> 15              | -          | -          | -          | -          | 0.1 ± 0.0  | -          |
| ΣMUFA                                | 22.8 ± 0.2 | 23.4 ± 0.1 | 21.4 ± 0.2 | 29.8 ± 0.4 | 29.1 ± 0.1 | 37.7 ± 0.3 |

Table S1:  
continues

|                                                | Blade      |            |            | Stipe      |            |            |
|------------------------------------------------|------------|------------|------------|------------|------------|------------|
|                                                | NL         | FFA        | PL         | NL         | FFA        | PL         |
| C16:2 <i>trans</i> 7,10 <sup>a</sup>           | 0.1 ± 0.0  | 0.1 ± 0.0  | 0.1 ± 0.0  | 0.1 ± 0.0  | 0.1 ± 0.0  | 0.1 ± 0.0  |
| C16:2 <i>trans</i> 9,12 <sup>a</sup>           | < 0.1      | < 0.1      | < 0.1      | 0.1 ± 0.0  | 0.2 ± 0.0  | 0.1 ± 0.0  |
| C16:4 <i>cis</i> 6,9,12,15 <sup>a</sup>        | -          | < 0.1      | -          | -          | -          | -          |
| C18:2 <i>cis</i> 9, 12 (n-6) (LA)              | 4.2 ± 0.0  | 3.7 ± 0.0  | 4.1 ± 0.1  | 4.1 ± 0.1  | 2.2 ± 0.0  | 4.4 ± 0.0  |
| C18:2 <sup>b</sup>                             | -          | < 0.1      | -          | -          | -          | -          |
| C18:3 <sup>b</sup>                             | 0.1 ± 0.0  | < 0.1      | 0.1 ± 0.0  | 0.2 ± 0.0  | 0.1 ± 0.0  | 0.3 ± 0.0  |
| C18:3 <i>cis</i> 6,9,12 (n-6)                  | 0.2 ± 0.0  | 0.3 ± 0.0  | 0.2 ± 0.0  | 0.4 ± 0.0  | 0.3 ± 0.0  | 0.4 ± 0.0  |
| C18:3 <i>cis</i> 9,12,15 (n-3) (ALA)           | 3.7 ± 0.1  | 6.7 ± 0.1  | 1.4 ± 0.0  | 0.7 ± 0.0  | 1.1 ± 0.0  | 0.2 ± 0.0  |
| C18:4 <i>cis</i> 6,9,12,15 (n-3) (SDA)         | 8.3 ± 0.2  | 13.8 ± 0.1 | 12.7 ± 0.2 | 0.8 ± 0.0  | 1.3 ± 0.0  | 1.0 ± 0.0  |
| C20:2 <i>cis</i> 11,14 (n-6)                   | 0.1 ± 0.0  | 0.1 ± 0.0  | 0.4 ± 0.0  | 0.2 ± 0.0  | 0.2 ± 0.0  | 0.4 ± 0.0  |
| C20:3 <i>cis</i> 5,8,11 <sup>a</sup>           | < 0.1      | < 0.1      | < 0.1      | 0.1 ± 0.0  | 0.1 ± 0.0  | 0.1 ± 0.0  |
| C20:3 <i>cis</i> 5,11,14 (n-6) <sup>a</sup>    | < 0.1      | < 0.1      | 0.1 ± 0.0  | 0.1 ± 0.0  | 0.2 ± 0.0  | 0.1 ± 0.0  |
| C20:3 <i>trans</i> 7,10,13 <sup>a</sup>        | < 0.1      | < 0.1      | < 0.1      | < 0.1      | -          | 0.1 ± 0.0  |
| C20:3 <i>cis</i> 8,11,14 (n-6)                 | 0.2 ± 0.0  | 0.1 ± 0.0  | 0.6 ± 0.0  | 0.3 ± 0.0  | 0.1 ± 0.0  | 0.8 ± 0.0  |
| C20:4 <i>cis</i> 5,8,11,14 (n-6) (AA)          | 23.3 ± 0.2 | 8.1 ± 0.1  | 17.1 ± 0.1 | 34.3 ± 0.1 | 12.2 ± 0.3 | 15.7 ± 0.3 |
| C20:4 <i>cis</i> 5,11,14,17 (n-3) <sup>a</sup> | < 0.1      | < 0.1      | 0.1 ± 0.0  | 0.1 ± 0.0  | -          | -          |
| C20:4 <i>cis</i> 8,11,14,17 (n-3)              | 1.0 ± 0.0  | 0.5 ± 0.0  | 1.7 ± 0.0  | 0.3 ± 0.0  | 0.2 ± 0.0  | 0.3 ± 0.0  |
| C20:5 <i>cis</i> 5,8,11,14,17 (n-3) (EPA)      | 19.4 ± 0.2 | 10.4 ± 0.1 | 21.0 ± 0.1 | 11.1 ± 0.2 | 3.0 ± 0.0  | 4.6 ± 0.1  |
| C22:5 <i>cis</i> 7,10,13,16,19 (n-3)           | 0.3 ± 0.0  | 0.1 ± 0.0  | 0.4 ± 0.0  | 0.3 ± 0.0  | 0.1 ± 0.0  | 0.1 ± 0.0  |
| C22:6 <i>cis</i> 4,7,10,13,16,19 (n-3) (DHA)   | -          | -          | -          | 0.1 ± 0.0  | 0.3 ± 0.0  | -          |
| ΣPUFA                                          | 61.0 ± 0.2 | 44.0 ± 0.1 | 59.8 ± 0.2 | 53.4 ± 0.2 | 21.7 ± 0.3 | 28.7 ± 0.3 |
| Σn-6                                           | 28.1 ± 0.2 | 12.3 ± 0.1 | 22.5 ± 0.1 | 39.5 ± 0.1 | 15.3 ± 0.3 | 21.8 ± 0.3 |
| Σn-3                                           | 32.8 ± 0.2 | 31.6 ± 0.1 | 37.2 ± 0.2 | 13.3 ± 0.2 | 5.9 ± <0.0 | 6.2 ± 0.1  |
| n-6/n-3 ratio                                  | 0.86       | 0.39       | 0.60       | 2.96       | 2.57       | 3.51       |

Four technical replicates were used for each fraction of blade and stipe. <sup>a</sup> Identified by NIST search only <sup>b</sup> Unknown isomer, identified by NIST search only. The standard deviations for the summarized categories, are the highest standard deviation among the summarized values. SFA; saturated fatty acids, MUFA; monounsaturated fatty acids, PUFA; polyunsaturated fatty acids, < LOQ; below limit of quantification, < 0.1; Fatty acid was identified –relative amount was less than 0.1 %, ± 0.0; 1 SD < 0.0, -; Fatty acid was not detected.

Table S2: Molecular species of monogalactosyldiacylglycerol in blade from *Laminaria hyperborea*.

| C  | DBE | RT    | <i>m/z</i> [M + Na] <sup>+</sup> | Acyl chains, listed in order of MS signal intensity ( <i>sn</i> -1/ <i>sn</i> -2) |                        |           |           |
|----|-----|-------|----------------------------------|-----------------------------------------------------------------------------------|------------------------|-----------|-----------|
| 30 | 0   | 87.6  | 725.51                           | 14:0/16:0                                                                         |                        |           |           |
| 30 | 1   | 76.6  | 723.50                           | 14:0/16:1                                                                         | 16:0/14:1              |           |           |
| 32 | 1   | 81.7  | 751.53                           | 14:0/18:1                                                                         |                        |           |           |
| 32 | 1   | 90.8  | 751.53                           | 14:0/18:1                                                                         | 16:0/16:1              |           |           |
| 32 | 2   | 81.8  | 749.51                           | 14:0/18:2                                                                         | 14:1/18:1              |           |           |
| 32 | 3   | 73.7  | 747.50                           | 14:0/18:3                                                                         |                        |           |           |
| 33 | 1   | 97.3  | 765.54                           | 15:0/18:1                                                                         | 16:0/17:1              | 17:0/16:1 |           |
| 34 | 1   | 103.4 | 779.56                           | 16:0/18:1                                                                         |                        |           |           |
| 34 | 3   | 87.8  | 775.53                           | 16:0/18:3                                                                         |                        |           |           |
| 34 | 4   | 79.1  | 773.51                           | 16:1/18:3                                                                         | 16:3/18:1              | 18:4/16:0 | 14:0/20:4 |
| 34 | 4   | 81.2  | 773.51                           | 18:4/16:0                                                                         | 20:4/14:0              | 16:3/18:1 |           |
| 34 | 5   | 70.4  | 771.50                           | 16:1/18:4                                                                         | 16:2/18:3              |           |           |
| 34 | 5   | 71.8  | 771.50                           | 18:4/16:1                                                                         | 16:4/18:1              | 16:2/18:3 |           |
| 34 | 5   | 73.2  | 771.50                           | 20:5/14:0                                                                         |                        | 16:4/18:1 |           |
| 34 | 6   | 62.2  | 769.48                           | 16:2/18:4                                                                         | 20:5/14:1              |           |           |
| 34 | 8   | 45.7  | 765.54                           | 16:4/18:4                                                                         |                        |           |           |
| 36 | 2   | 105.9 | 805.58                           | 18:1/18:1                                                                         | 16:0/20:2              |           |           |
| 36 | 2   | 107.1 | 805.58                           | 16:0/20:2                                                                         | 18:1/18:1              | 18:0/18:2 |           |
| 36 | 3   | 98.0  | 803.56                           | 18:2/18:1                                                                         |                        |           |           |
| 36 | 4   | 90.8  | 801.54                           | 18:3/18:1                                                                         |                        |           |           |
| 36 | 5   | 76.7  | 799.53                           | 20:5/16:0                                                                         | 18:4/18:1              | 20:4/16:1 | 18:2/18:3 |
| 36 | 5   | 82.1  | 799.53                           | 18:3/18:2                                                                         | 18:1/18:4              | 20:4/16:1 |           |
| 36 | 5   | 84.3  | 799.53                           | 18:4/18:1                                                                         | 20:4/16:1              | 18:3/18:2 |           |
| 36 | 5   | 87.4  | 799.53                           | 20:5/16:0                                                                         |                        |           |           |
| 36 | 6   | 74.2  | 797.51                           | 18:3/18:3                                                                         |                        |           |           |
| 36 | 6   | 75.2  | 797.51                           | 18:4/18:2                                                                         | 18:3/18:3              | 18:5/18:1 |           |
| 36 | 6   | 76.8  | 797.51                           | 20:5/16:1                                                                         | 18:4/18:2              | 18:3/18:3 | 20:4/16:2 |
| 36 | 7   | 66.4  | 795.59                           | 18:3/18:4                                                                         | 16:0/20:7 or 17:7/19:0 |           |           |
| 36 | 7   | 67.3  | 795.59                           | 18:4/18:3                                                                         |                        |           |           |
| 36 | 8   | 59.5  | 793.48                           | 18:4/18:4                                                                         |                        |           |           |
| 36 | 9   | 49.3  | 791.58                           | 18:4/18:5                                                                         |                        |           |           |
| 36 | 9   | 52.4  | 791.58                           | 20:5/16:4                                                                         | 18:5/18:4              |           |           |
| 38 | 5   | 90.3  | 827.56                           | 20:5/18:0                                                                         | 20:4/18:1              |           |           |
| 38 | 5   | 95.6  | 827.56                           | 20:4/18:1                                                                         |                        |           |           |
| 38 | 5   | 97.4  | 827.56                           | 20:4/18:1                                                                         | 22:5/16:0              | 18:4/20:1 |           |
| 38 | 6   | 90.1  | 825.54                           | 20:4/18:2                                                                         |                        |           |           |

Table S2:  
continues

| C  | DBE | RT    | <i>m/z</i> [M + Na] <sup>+</sup> | Acyl chains, listed in order of MS signal intensity ( <i>sn</i> -1/ <i>sn</i> -2) |           |           |
|----|-----|-------|----------------------------------|-----------------------------------------------------------------------------------|-----------|-----------|
| 38 | 7   | 76.2  | 823.53                           | 20:3/18:4                                                                         |           |           |
| 38 | 7   | 78.8  | 823.53                           | 20:4/18:3                                                                         | 18:2/20:5 |           |
| 38 | 7   | 79.9  | 823.53                           | 18:4/20:3                                                                         | 20:4/18:3 |           |
| 38 | 7   | 81.6  | 823.53                           | 20:5/18:2                                                                         | 20:4/18:3 | 20:3/18:4 |
| 38 | 7   | 81.6  | 823.53                           | 20:4/18:3                                                                         |           |           |
| 38 | 7   | 83.4  | 823.53                           | 20:5/18:2                                                                         | 20:4/18:3 | 18:4/20:3 |
| 38 | 8   | 66.5  | 821.51                           | 20:5/18:3                                                                         | 20:4/18:4 |           |
| 38 | 8   | 73.7  | 821.51                           | 20:5/18:3                                                                         | 18:4/20:4 |           |
| 38 | 8   | 74.6  | 821.51                           | 20:5/18:3                                                                         | 20:4/18:4 |           |
| 38 | 9   | 66.8  | 819.50                           | 20:5/18:4                                                                         |           |           |
| 40 | 6   | 100.1 | 853.58                           | 22:5/18:1                                                                         | 20:4/20:2 |           |
| 40 | 8   | 84.1  | 849.54                           | 22:5/18:3                                                                         | 20:4/20:4 |           |
| 40 | 8   | 85.2  | 849.54                           | 22:5/18:3                                                                         | 22:4/18:4 |           |
| 40 | 8   | 85.9  | 849.54                           | 20:5/20:3                                                                         | 20:4/20:4 |           |
| 40 | 8   | 88.3  | 849.54                           | 20:4/20:4                                                                         |           |           |
| 40 | 9   | 78.6  | 847.53                           | 22:5/18:4                                                                         | 20:5/20:4 |           |
| 40 | 9   | 81.0  | 847.53                           | 20:4/20:5                                                                         |           |           |
| 40 | 10  | 73.2  | 845.51                           | 20:5/20:5                                                                         |           |           |

C; total number of carbon atoms in the acyl chains, DBE; total number of double bond equivalents in the acyl chains, RT; retention time (min)

Table S3: Molecular species of digalactosyldiacylglycerol in blade from *Laminaria hyperborea*

| C  | DBE | RT    | <i>m/z</i> [M + Na] <sup>+</sup> | Acyl chains, listed in order of MS signal intensity ( <i>sn</i> -1/ <i>sn</i> -2) |           |                        |           |
|----|-----|-------|----------------------------------|-----------------------------------------------------------------------------------|-----------|------------------------|-----------|
| 30 | 1   | 67.7  | 885.64                           | 14:0/16:1                                                                         | 12:0/18:1 |                        |           |
| 32 | 1   | 81.7  | 913.67                           | 14:0/18:1                                                                         | 16:0/16:1 |                        |           |
| 32 | 2   | 72.6  | 911.65                           | 14:0/18:2                                                                         | 14:1/18:1 |                        |           |
| 32 | 3   | 64.4  | 909.64                           | 14:0/18:3                                                                         |           |                        |           |
| 34 | 1   | 95.0  | 941.70                           | 16:0/18:1                                                                         | 14:0/20:1 |                        |           |
| 34 | 2   | 85.3  | 939.69                           | 16:1/18:1                                                                         | 20:2/14:0 |                        |           |
| 34 | 2   | 86.7  | 939.69                           | 16:0/18:2                                                                         | 14:0/20:2 |                        |           |
| 34 | 4   | 68.2  | 935.57                           | 18:3/16:1                                                                         | 16:2/18:2 |                        |           |
| 34 | 4   | 72.1  | 935.57                           | 18:4/16:0                                                                         | 20:4/14:0 | 18:1/16:3              |           |
| 34 | 5   | 61.1  | 933.56                           | 16:1/18:4                                                                         |           |                        |           |
| 34 | 5   | 64.0  | 933.56                           | 20:5/14:0                                                                         |           |                        |           |
| 35 | 1   | 101.0 | 955.64                           | 17:0/18:1                                                                         | 16:0/19:1 |                        |           |
| 36 | 1   | 97.8  | 969.65                           | 18:1/18:0                                                                         |           |                        |           |
| 36 | 2   | 98.0  | 967.72                           | 18:1/18:1                                                                         | 16:0/20:2 |                        |           |
| 36 | 3   | 89.5  | 965.70                           | 18:2/18:1                                                                         | 16:1/20:2 |                        |           |
| 36 | 4   | 81.0  | 963.60                           | 18:2/18:2                                                                         | 16:1/20:3 |                        |           |
| 36 | 4   | 82.1  | 963.60                           | 18:3/18:1                                                                         | 18:2/18:2 | 16:1/20:3              |           |
| 36 | 5   | 73.2  | 961.59                           | 18:3/18:2                                                                         | 20:4/16:1 |                        |           |
| 36 | 5   | 75.5  | 961.59                           | 18:4/18:1                                                                         | 20:4/16:1 | 18:3/18:2              | 14:0/22:5 |
| 36 | 5   | 78.4  | 961.59                           | 20:5/16:0                                                                         |           |                        |           |
| 36 | 6   | 67.8  | 959.57                           | 20:5/16:1                                                                         |           |                        |           |
| 36 | 7   | 58.3  | 957.56                           | 18:3/18:4                                                                         | 20:5/16:2 | 16:0/20:7 or 17:7/19:0 |           |
| 36 | 7   | 60.3  | 957.56                           | 20:5/16:2                                                                         | 18:3/18:4 |                        |           |
| 36 | 8   | 50.8  | 955.54                           | 18:4/18:4                                                                         |           |                        |           |
| 38 | 5   | 81.7  | 989.62                           | 20:5/18:0                                                                         | 18:1/20:4 |                        |           |
| 38 | 5   | 87.0  | 989.62                           | 20:4/18:1                                                                         | 20:3/18:2 |                        |           |
| 38 | 5   | 89.0  | 989.62                           | 20:4/18:1                                                                         | 22:5/16:0 | 18:4/20:1              |           |
| 38 | 6   | 80.3  | 987.60                           | 20:4/18:2                                                                         | 20:2/18:4 |                        |           |
| 38 | 6   | 81.6  | 987.60                           | 20:5/18:1                                                                         |           |                        |           |
| 38 | 7   | 72.7  | 985.59                           | 20:5/18:2                                                                         | 20:4/18:3 | 18:4/20:3              |           |
| 38 | 7   | 74.6  | 985.59                           | 20:5/18:2                                                                         | 20:4/18:3 | 20:3/18:4              |           |
| 38 | 8   | 64.7  | 983.57                           | 20:5/18:3                                                                         |           |                        |           |
| 38 | 8   | 65.8  | 983.57                           | 20:4/18:4                                                                         | 20:5/18:3 |                        |           |
| 38 | 9   | 57.6  | 981.56                           | 20:5/18:4                                                                         |           |                        |           |

C; total number of carbon atoms in the acyl chains, DBE; total number of double bond equivalents in the acyl chains, RT; retention time (min)

Table S4: Molecular species of monogalactosyldiacylglycerol in stipe from *Laminaria hyperborea*

| C  | DBE | RT    | <i>m/z</i> [M + Na] <sup>+</sup> | Acyl chains, listed in order of MS signal intensity ( <i>sn</i> -1/ <i>sn</i> -2) |                        |           |           |
|----|-----|-------|----------------------------------|-----------------------------------------------------------------------------------|------------------------|-----------|-----------|
| 28 | 0   | 74.2  | 697.48                           | 14:0/14:0                                                                         | 12:0/16:0              |           |           |
| 30 | 0   | 87.7  | 725.51                           | 14:0/16:0                                                                         |                        |           |           |
| 30 | 1   | 77.3  | 723.50                           | 14:0/16:1                                                                         | 12:0/18:1              |           |           |
| 31 | 1   | 84.4  | 737.51                           | 14:0/17:1                                                                         | 15:0/16:1              | 13:0/18:1 |           |
| 31 | 1   | 85.4  | 737.51                           | 15:0/16:1                                                                         |                        |           |           |
| 32 | 1   | 91.0  | 751.53                           | 14:0/18:1                                                                         | 16:0/16:1              |           |           |
| 32 | 2   | 81.0  | 749.51                           | 16:1/16:1                                                                         | 14:1/18:1              |           |           |
| 32 | 2   | 82.3  | 749.51                           | 14:0/18:2                                                                         |                        |           |           |
| 32 | 3   | 72.6  | 747.50                           | 16:2/16:1                                                                         | 14:1/18:2              |           |           |
| 32 | 3   | 74.4  | 747.50                           | 14:0/18:3                                                                         | 16:1/16:2              | 14:1/18:2 | 16:3/16:0 |
| 32 | 3   | 75.5  | 747.50                           | 14:0/18:3                                                                         | 16:0/16:3              |           |           |
| 32 | 3   | 76.8  | 747.50                           | 14:0/18:3                                                                         | 16:0/16:3              | 16:2/16:1 |           |
| 33 | 1   | 89.0  | 765.54                           | 15:0/18:1                                                                         |                        |           |           |
| 33 | 1   | 97.1  | 765.54                           | 15:0/18:1                                                                         | 14:0/19:1              | 16:0/17:1 | 17:0/16:1 |
| 34 | 1   | 103.1 | 779.56                           | 16:0/18:1                                                                         | 14:0/20:1              |           |           |
| 34 | 2   | 94.1  | 777.54                           | 16:1/18:1                                                                         |                        |           |           |
| 34 | 2   | 95.6  | 777.54                           | 16:0/18:2                                                                         |                        |           |           |
| 34 | 3   | 85.7  | 775.53                           | 16:1/18:2                                                                         |                        |           |           |
| 34 | 3   | 86.5  | 775.53                           | 16:2/18:1                                                                         | 16:1/18:2              |           |           |
| 34 | 3   | 87.6  | 775.53                           | 16:2/18:1                                                                         | 14:0/20:3              | 16:1/18:2 |           |
| 34 | 3   | 88.2  | 775.53                           | 16:0/18:3                                                                         | 14:0/20:3              | 16:1/18:2 |           |
| 34 | 3   | 89.4  | 775.53                           | 16:0/18:3                                                                         | 14:0/20:3              |           |           |
| 34 | 3   | 90.2  | 775.53                           | 14:0/20:3                                                                         | 16:0/18:3              | 18:0/16:3 |           |
| 34 | 4   | 78.1  | 773.51                           | 18:3/16:1                                                                         |                        |           |           |
| 34 | 4   | 79.4  | 773.51                           | 16:1/18:3                                                                         | 16:3/18:1              |           |           |
| 34 | 4   | 80.0  | 773.51                           | 14:0/20:4                                                                         | 16:3/18:1              | 16:1/18:3 |           |
| 34 | 4   | 80.7  | 773.51                           | 16:2/18:2                                                                         | 20:4/14:0              | 16:1/18:3 | 16:3/18:1 |
| 34 | 4   | 81.7  | 773.51                           | 20:4/14:0                                                                         | 18:4/16:0              |           |           |
| 34 | 4   | 82.1  | 773.51                           | 14:0/20:4                                                                         | 16:0/18:4              | 16:3/18:1 |           |
| 34 | 5   | 71.7  | 771.50                           | 16:1/18:4                                                                         | 16:2/18:3              | 20:4/14:1 |           |
| 34 | 5   | 74.0  | 771.50                           | 20:5/14:0                                                                         |                        |           |           |
| 34 | 7   | 52.8  | 767.69                           | 14:0/20:7 or 15:7/19:0                                                            |                        |           |           |
| 34 | 7   | 53.5  | 767.69                           | 14:0/20:7 or 15:7/19:0                                                            | 16:0/18:7 or 17:7/17:0 |           |           |
| 34 | 7   | 55.1  | 767.69                           | 16:3/18:4                                                                         | 14:0/20:7 or 15:7/19:0 | 16:4/18:3 |           |
| 34 | 7   | 55.9  | 767.69                           | 16:4/18:3                                                                         | 18:4/16:3              | 20:5/14:2 |           |
| 35 | 1   | 108.6 | 793.58                           | 17:0/18:1                                                                         | 16:0/19:1              | 15:0/20:1 |           |

Table S4:  
continues

| C  | DBE | RT    | <i>m/z</i> [M + Na] <sup>+</sup> | Acyl chains, listed in order of MS signal intensity ( <i>sn</i> -1/ <i>sn</i> -2) |           |           |           |
|----|-----|-------|----------------------------------|-----------------------------------------------------------------------------------|-----------|-----------|-----------|
| 36 | 1   | 105.6 | 807.59                           | 18:1/18:0                                                                         | 16:1/20:0 |           |           |
| 36 | 1   | 106.3 | 807.59                           | 16:0/20:1                                                                         | 18:1/18:0 |           |           |
| 36 | 1   | 113.9 | 807.59                           | 18:0/18:1                                                                         | 16:0/20:1 | 14:0/22:1 | 20:0/16:1 |
| 36 | 2   | 105.7 | 805.58                           | 18:1/18:1                                                                         | 16:1/20:1 |           |           |
| 36 | 2   | 106.2 | 805.58                           | 16:0/20:2                                                                         | 18:1/18:1 |           |           |
| 36 | 2   | 107.1 | 805.58                           | 16:0/20:2                                                                         | 18:0/18:2 |           |           |
| 36 | 3   | 98.2  | 803.56                           | 18:2/18:1                                                                         |           |           |           |
| 36 | 3   | 99.6  | 803.56                           | 18:2/18:1                                                                         | 16:0/20:3 |           |           |
| 36 | 3   | 100.6 | 803.56                           | 16:0/20:3                                                                         | 18:0/18:3 |           |           |
| 36 | 3   | 102.3 | 803.56                           | 16:0/20:3                                                                         |           |           |           |
| 36 | 5   | 82.9  | 799.53                           | 18:3/18:2                                                                         | 16:2/20:3 |           |           |
| 36 | 5   | 84.1  | 799.53                           | 18:2/18:3                                                                         | 20:4/16:1 | 16:2/20:3 |           |
| 36 | 5   | 85.1  | 799.53                           | 18:4/18:1                                                                         | 20:4/16:1 | 18:3/18:2 | 22:5/14:0 |
| 36 | 5   | 87.8  | 799.53                           | 20:5/16:0                                                                         |           |           |           |
| 36 | 5   | 92.5  | 799.53                           | 20:5/16:0                                                                         |           |           |           |
| 36 | 6   | 69.4  | 797.51                           | 18:3/18:3                                                                         | 18:4/18:2 |           |           |
| 36 | 6   | 70.5  | 797.51                           | 20:5/16:1                                                                         | 20:4/16:2 | 18:3/18:3 | 18:4/18:2 |
| 36 | 6   | 75.3  | 797.51                           | 18:3/18:3                                                                         | 16:2/20:4 |           |           |
| 36 | 6   | 76.3  | 797.51                           | 18:2/18:4                                                                         | 18:3/18:3 | 18:5/18:1 | 16:2/20:4 |
| 36 | 6   | 77.1  | 797.51                           | 18:3/18:3                                                                         | 20:4/16:2 | 18:4/18:2 |           |
| 36 | 6   | 77.8  | 797.51                           | 20:5/16:1                                                                         | 18:4/18:2 | 18:3/18:3 |           |
| 36 | 6   | 78.0  | 797.51                           | 18:4/18:2                                                                         | 18:3/18:3 | 20:4/16:2 |           |
| 36 | 6   | 79.2  | 797.51                           | 20:5/16:1                                                                         | 18:4/18:2 | 18:5/18:1 | 16:2/20:4 |
| 36 | 6   | 84.8  | 797.51                           | 20:6/16:0                                                                         |           |           |           |
| 36 | 7   | 61.2  | 795.65                           | 18:4/18:3                                                                         |           |           |           |
| 36 | 7   | 62.1  | 795.65                           | 20:5/16:2                                                                         | 16:3/20:4 | 18:4/18:3 |           |
| 36 | 7   | 67.5  | 795.65                           | 16:0/20:7 or 17:7/19:0                                                            |           |           |           |
| 36 | 7   | 68.3  | 795.65                           | 16:0/20:7 or 17:7/19:0                                                            | 18:3/18:4 | 19:1/17:6 |           |
| 36 | 7   | 69.3  | 795.65                           | 18:4/18:3                                                                         | 20:5/16:2 |           |           |
| 36 | 7   | 70.5  | 795.65                           | 20:5/16:2                                                                         | 18:3/18:4 |           |           |

Table S4:  
continues

| C  | DBE | RT    | <i>m/z</i> [M + Na] <sup>+</sup> | Acyl chains, listed in order of MS signal intensity ( <i>sn</i> -1/ <i>sn</i> -2) |                        |           |           |           |
|----|-----|-------|----------------------------------|-----------------------------------------------------------------------------------|------------------------|-----------|-----------|-----------|
| 36 | 8   | 54.7  | 793.58                           | 20:5/16:3                                                                         | 16:4/20:4              |           |           |           |
| 36 | 8   | 56.7  | 793.58                           | 16:1/20:7 or 17:8/19:0                                                            | 18:7/18:1 or 17:0/19:8 |           |           |           |
| 36 | 8   | 57.3  | 793.58                           | 16:1/20:7 or 17:8/19:0                                                            | 18:7/18:1 or 17:0/19:8 |           |           |           |
| 36 | 8   | 61.2  | 793.58                           | 18:4/18:4                                                                         | 16:0/20:8 or 17:7/19:1 | 11:3/25:5 |           |           |
| 36 | 8   | 62.2  | 793.58                           | 20:5/16:3                                                                         | 18:4/18:4              |           |           |           |
| 36 | 8   | 68.2  | 793.58                           | 16:0/20:8 or 17:7/19:1                                                            |                        |           |           |           |
| 36 | 8   | 68.9  | 793.58                           | 16:0/20:8 or 17:7/19:1                                                            |                        |           |           |           |
| 36 | 9   | 50.1  | 791.56                           | 16:1/20:8 or 17:8/19:1                                                            | 18:8/18:1 or 17:1/19:8 |           |           |           |
| 36 | 9   | 51.4  | 791.56                           | 18:4/18:5                                                                         | 18:8/18:1 or 17:1/19:8 |           |           |           |
| 36 | 9   | 54.6  | 791.56                           | 20:5/16:4                                                                         | 18:5/18:4              |           |           |           |
| 36 | 9   | 57.1  | 791.56                           | 18:8/18:1 or 17:1/19:8                                                            | 16:1/20:8 or 17:8/19:1 |           |           |           |
| 36 | 9   | 60.9  | 791.56                           | 16:0/20:9 or 17:7/19:2                                                            | 18:8/18:1 or 17:1/19:8 |           |           |           |
| 38 | 5   | 88.6  | 827.56                           | 22:5/16:0                                                                         | 22:4/16:1              |           |           |           |
| 38 | 5   | 89.6  | 827.56                           | 20:4/18:1                                                                         | 20:3/18:2              |           |           |           |
| 38 | 5   | 90.6  | 827.56                           | 20:5/18:0                                                                         | 20:4/18:1              | 18:2/20:3 |           |           |
| 38 | 5   | 95.9  | 827.56                           | 20:4/18:1                                                                         | 20:3/18:2              | 20:2/18:3 |           |           |
| 38 | 5   | 96.6  | 827.56                           | 20:4/18:1                                                                         | 20:3/18:2              | 18:3/20:2 |           |           |
| 38 | 5   | 97.5  | 827.56                           | 20:4/18:1                                                                         | 16:0/22:5              | 20:1/18:4 | 20:3/18:2 |           |
| 38 | 5   | 98.7  | 827.56                           | 20:4/18:1                                                                         | 20:3/18:2              | 18:4/20:1 |           |           |
| 38 | 5   | 100.1 | 827.56                           | 20:5/18:0                                                                         |                        |           |           |           |
| 38 | 6   | 82.5  | 825.54                           | 20:5/18:1                                                                         | 20:4/18:2              | 20:3/18:3 |           |           |
| 38 | 6   | 83.2  | 825.54                           | 20:4/18:2                                                                         | 18:3/20:3              |           |           |           |
| 38 | 6   | 84.2  | 825.54                           | 20:5/18:1                                                                         | 18:2/20:4              | 18:3/20:3 |           |           |
| 38 | 6   | 88.5  | 825.54                           | 22:5/16:1                                                                         | 20:4/18:2              | 20:3/18:3 |           |           |
| 38 | 6   | 89.5  | 825.54                           | 20:4/18:2                                                                         | 20:3/18:3              | 16:1/22:5 | 20:2/18:4 | 22:4/16:2 |
| 38 | 6   | 90.7  | 825.54                           | 20:5/18:1                                                                         | 20:4/18:2              |           |           |           |
| 38 | 7   | 74.8  | 823.53                           | 20:4/18:3                                                                         | 20:5/18:2              | 18:4/20:3 |           |           |
| 38 | 7   | 75.7  | 823.53                           | 20:5/18:2                                                                         | 20:4/18:3              | 18:4/20:3 |           |           |
| 38 | 7   | 78.1  | 823.53                           | 20:3/18:4                                                                         |                        |           |           |           |
| 38 | 7   | 82.5  | 823.53                           | 20:5/18:2                                                                         | 20:4/18:3              | 20:3/18:4 |           |           |
| 38 | 7   | 83.2  | 823.53                           | 20:4/18:3                                                                         |                        |           |           |           |
| 38 | 7   | 84.1  | 823.53                           | 20:5/18:2                                                                         | 20:4/18:3              |           |           |           |
| 38 | 8   | 74.8  | 821.61                           | 20:5/18:3                                                                         | 20:4/18:4              |           |           |           |
| 38 | 8   | 75.8  | 821.61                           | 20:5/18:3                                                                         | 20:4/18:4              |           |           |           |
| 38 | 9   | 68.1  | 819.59                           | 20:5/18:4                                                                         |                        |           |           |           |



Table S4:  
continues

| C  | DBE | RT   | <i>m/z</i> [M + Na] <sup>+</sup> | Acyl chains, listed in order of MS signal intensity ( <i>sn</i> -1/ <i>sn</i> -2) |           |
|----|-----|------|----------------------------------|-----------------------------------------------------------------------------------|-----------|
| 40 | 8   | 79.4 | 849.70                           | 22:5/18:3                                                                         | 18:4/22:4 |
| 40 | 8   | 82.0 | 849.70                           | 20:4/20:4                                                                         | 20:5/20:3 |
| 40 | 8   | 86.7 | 849.54                           | 22:5/18:3                                                                         | 22:4/18:4 |
| 40 | 8   | 89.0 | 849.54                           | 20:4/20:4                                                                         |           |
| 40 | 9   | 74.6 | 847.53                           | 20:5/20:4                                                                         |           |
| 40 | 9   | 79.5 | 847.53                           | 22:5/18:4                                                                         |           |
| 40 | 9   | 80.1 | 847.53                           | 20:5/20:4                                                                         | 22:5/18:4 |
| 40 | 9   | 81.9 | 847.53                           | 20:4/20:5                                                                         |           |
| 40 | 10  | 74.6 | 845.53                           | 20:5/20:5                                                                         |           |

C; total number of carbon atoms in the acyl chains, DBE; total number of double bond equivalents in the acyl chains, RT; retention time (min)

Table S5: Molecular species of digalactosyldiacylglycerol in stipe from *Laminaria hyperborea*

| C  | DBE | RT    | <i>m/z</i> [M + Na] <sup>+</sup> | Acyl chains, listed in order of MS signal intensity ( <i>sn</i> -1/ <i>sn</i> -2) |           |           |           |
|----|-----|-------|----------------------------------|-----------------------------------------------------------------------------------|-----------|-----------|-----------|
| 30 | 1   | 68.3  | 885.64                           | 14:0/16:1                                                                         | 12:0/18:1 |           |           |
| 32 | 1   | 82.2  | 913.67                           | 14:0/18:1                                                                         | 16:0/16:1 |           |           |
| 32 | 2   | 72.1  | 911.65                           | 16:1/16:1                                                                         |           |           |           |
| 32 | 2   | 72.6  | 911.65                           | 14:1/18:1                                                                         | 16:1/16:1 |           |           |
| 32 | 2   | 73.4  | 911.65                           | 14:0/18:2                                                                         |           |           |           |
| 34 | 1   | 95.0  | 941.70                           | 16:0/18:1                                                                         | 14:0/20:1 |           |           |
| 34 | 2   | 85.6  | 939.69                           | 16:1/18:1                                                                         |           |           |           |
| 34 | 2   | 86.9  | 939.69                           | 16:0/18:2                                                                         |           |           |           |
| 34 | 3   | 72.8  | 937.67                           | 14:0/20:3                                                                         |           |           |           |
| 34 | 3   | 76.9  | 937.67                           | 16:1/18:2                                                                         |           |           |           |
| 34 | 3   | 77.7  | 937.67                           | 16:2/18:1                                                                         | 16:1/18:2 |           |           |
| 34 | 3   | 78.7  | 937.67                           | 16:2/18:1                                                                         | 14:0/20:3 | 16:1/18:2 |           |
| 34 | 3   | 79.5  | 937.67                           | 16:0/18:3                                                                         | 14:0/20:3 | 18:2/16:1 |           |
| 34 | 3   | 80.8  | 937.67                           | 16:0/18:3                                                                         |           |           |           |
| 34 | 3   | 81.7  | 937.67                           | 14:0/20:3                                                                         | 16:0/18:3 |           |           |
| 34 | 4   | 65.0  | 935.72                           | 14:0/20:4                                                                         |           |           |           |
| 34 | 4   | 69.1  | 935.72                           | 18:3/16:1                                                                         | 16:2/18:2 |           |           |
| 34 | 4   | 70.4  | 935.72                           | 16:1/18:3                                                                         | 16:3/18:1 |           |           |
| 34 | 4   | 71.1  | 935.72                           | 14:0/20:4                                                                         | 18:3/16:1 | 16:3/18:1 | 18:2/16:2 |
| 34 | 4   | 72.8  | 935.72                           | 20:4/14:0                                                                         | 18:4/16:0 |           |           |
| 34 | 4   | 73.2  | 935.72                           | 14:0/20:4                                                                         | 16:0/18:4 | 16:3/18:1 |           |
| 35 | 1   | 100.6 | 955.64                           | 17:0/18:1                                                                         | 16:0/19:1 | 15:0/20:1 |           |
| 36 | 2   | 97.7  | 967.72                           | 18:1/18:1                                                                         | 16:1/20:1 | 16:0/20:2 |           |
| 36 | 3   | 89.9  | 965.70                           | 18:2/18:1                                                                         | 20:2/16:1 |           |           |
| 36 | 3   | 91.5  | 965.70                           | 18:2/18:1                                                                         | 16:0/20:3 |           |           |
| 36 | 3   | 92.4  | 965.70                           | 16:0/20:3                                                                         | 18:2/18:1 |           |           |
| 36 | 4   | 76.4  | 963.60                           | 20:4/16:0                                                                         | 16:1/20:3 | 18:4/18:0 |           |
| 36 | 4   | 79.2  | 963.60                           | 16:0/20:4                                                                         |           |           |           |
| 36 | 4   | 81.7  | 963.60                           | 18:2/18:2                                                                         | 20:3/16:1 |           |           |
| 36 | 4   | 82.8  | 963.60                           | 18:3/18:1                                                                         | 16:1/20:3 | 18:2/18:2 |           |
| 36 | 4   | 83.6  | 963.60                           | 18:3/18:1                                                                         | 18:2/18:2 |           |           |
| 36 | 4   | 84.7  | 963.60                           | 18:3/18:1                                                                         | 16:0/20:4 | 20:3/16:1 | 18:2/18:2 |
| 36 | 4   | 86.3  | 963.60                           | 20:4/16:0                                                                         |           |           |           |
| 36 | 4   | 86.7  | 963.60                           | 16:0/20:4                                                                         |           |           |           |

Table S5:  
continues

| C  | DBE | RT   | <i>m/z</i> [M + Na] <sup>+</sup> | Acyl chains, listed in order of MS signal intensity ( <i>sn</i> -1/ <i>sn</i> -2) |           |                        |           |
|----|-----|------|----------------------------------|-----------------------------------------------------------------------------------|-----------|------------------------|-----------|
| 36 | 5   | 74.1 | 961.59                           | 18:3/18:2                                                                         |           |                        |           |
| 36 | 5   | 76.4 | 961.59                           | 20:4/16:1                                                                         | 18:4/18:1 | 14:0/22:5              | 18:3/18:2 |
| 36 | 5   | 79.1 | 961.59                           | 20:5/16:0                                                                         |           |                        |           |
| 36 | 6   | 66.3 | 959.57                           | 18:3/18:3                                                                         |           |                        |           |
| 36 | 6   | 67.6 | 959.57                           | 18:2/18:4                                                                         | 18:3/18:3 | 18:5/18:1              |           |
| 36 | 6   | 68.9 | 959.57                           | 20:5/16:1                                                                         | 18:4/18:2 | 18:3/18:3              |           |
| 36 | 6   | 70.4 | 959.57                           | 20:5/16:1                                                                         | 18:5/18:1 | 18:4/18:2              |           |
| 36 | 6   | 76.3 | 959.57                           | 20:6/16:0                                                                         |           |                        |           |
| 36 | 6   | 77.0 | 959.57                           | 20:6/16:0                                                                         |           |                        |           |
| 36 | 7   | 60.4 | 957.65                           | 20:5/16:2                                                                         | 18:4/18:3 | 16:0/20:7 or 17:7/19:0 |           |
| 36 | 7   | 61.6 | 957.65                           | 20:5/16:2                                                                         | 18:3/18:4 |                        |           |
| 38 | 5   | 82.3 | 989.62                           | 20:5/18:0                                                                         | 18:1/20:4 |                        |           |
| 38 | 5   | 86.5 | 989.62                           | 20:3/18:2                                                                         | 18:3/20:2 |                        |           |
| 38 | 5   | 87.5 | 989.62                           | 20:4/18:1                                                                         |           |                        |           |
| 38 | 5   | 89.2 | 989.62                           | 20:4/18:1                                                                         | 22:5/16:0 |                        |           |
| 38 | 6   | 73.7 | 987.60                           | 20:5/18:1                                                                         | 18:2/20:4 | 18:3/20:3              |           |
| 38 | 6   | 75.6 | 987.60                           | 20:5/18:1                                                                         | 20:4/18:2 | 20:3/18:3              |           |
| 38 | 6   | 80.0 | 987.60                           | 22:5/16:1                                                                         | 20:4/18:2 |                        |           |
| 38 | 6   | 81.1 | 987.60                           | 20:4/18:2                                                                         | 20:5/18:1 | 18:4/20:2              | 16:1/22:5 |
| 38 | 6   | 82.4 | 987.60                           | 20:5/18:1                                                                         | 20:4/18:2 |                        |           |
| 38 | 7   | 59.5 | 985.68                           | 20:4/18:3                                                                         | 20:5/18:2 | 18:4/20:3              |           |
| 38 | 7   | 66.0 | 985.68                           | 20:5/18:2                                                                         | 18:3/20:4 | 18:4/20:3              |           |
| 38 | 7   | 67.0 | 985.68                           | 20:5/18:2                                                                         | 20:4/18:3 | 20:3/18:4              |           |
| 38 | 7   | 73.7 | 985.68                           | 20:5/18:2                                                                         | 20:4/18:3 | 20:3/18:4              | 22:5/16:2 |
| 38 | 7   | 74.6 | 985.68                           | 20:4/18:3                                                                         | 20:5/18:2 |                        |           |
| 38 | 7   | 75.6 | 985.68                           | 20:5/18:2                                                                         | 20:3/18:4 |                        |           |
| 38 | 8   | 59.2 | 983.67                           | 20:5/18:3                                                                         | 18:4/20:4 |                        |           |
| 38 | 8   | 66.0 | 983.67                           | 20:5/18:3                                                                         | 20:4/18:4 |                        |           |
| 38 | 8   | 67.1 | 983.67                           | 20:5/18:3                                                                         | 20:4/18:4 |                        |           |
| 38 | 9   | 59.2 | 981.56                           | 20:5/18:4                                                                         |           |                        |           |

C; total number of carbon atoms in the acyl chains, DBE; total number of double bond equivalents in the acyl chains, RT; retention time (min)

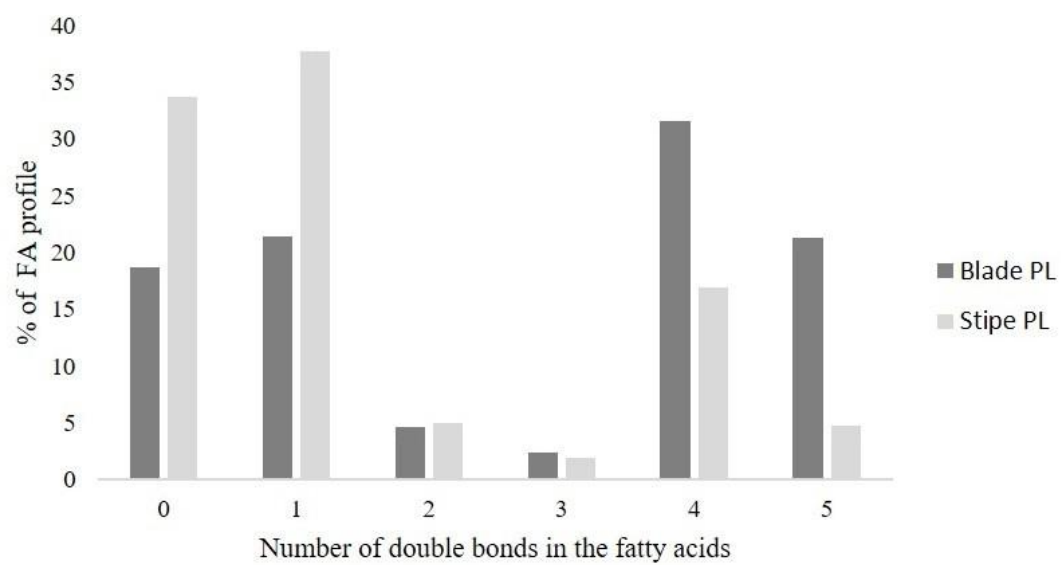

Figure S1: Distribution of double bonds for the fatty acids in the polar lipid (PL) fraction of stipe and blade from *Laminaria hyperborea*.
